# Supplementary material for: Patients’ Opinions towards the Services of Pharmacists Based in General Practice
Source: MDPI journal article supplement (doi:10.3390/pharmacy10040078), 2022-07-07
Supplement: s1 [file s1]

**Table S1: Details of patient visits to general practice pharmacists**

| Detail                                                                            | Respondents n=46 (%) |
|-----------------------------------------------------------------------------------|----------------------|
| Frequency of visiting the pharmacist                                              |                      |
| First time                                                                        | 20 (44)              |
| 2 times                                                                           | 8 (17)               |
| 3 times                                                                           | 9 (20)               |
| 4 times                                                                           | 2 (4)                |
| 5 times or more                                                                   | 6 (13)               |
| Not answered                                                                      | 1 (2)                |
| Reason for visiting the pharmacist (allowed to select all the applicable options) |                      |
| For a routine check to verify my medicines are working for me                     | 18 (39)              |
| To ask for advice to modify lifestyle                                             | 5 (11)               |
| To check for drug interactions                                                    | 3 (7)                |
| To report adverse effects                                                         | 4 (9)                |
| For a health assessment                                                           | 9 (20)               |
| For vaccination                                                                   | 9 (20)               |
| Other                                                                             | 8 (17)               |
| Referral to the pharmacist by                                                     |                      |
| General practitioner                                                              | 31 (67)              |
| Nurse                                                                             | 4 (9)                |
| Receptionist                                                                      | 2 (4)                |
| Psychologist                                                                      | 1 (2)                |
| Self                                                                              | 2 (4)                |
| Other                                                                             | 6 (13)               |
